# Supplementary material for: Charting the salt–cocrystal continuum of acid–base multicomponent crystals with hybrid density functional theory
Source: Royal Society of Chemistry journal article supplement (doi:10.1039/d4ce00903g), 2024-01-01
Supplement: d4ce00903g1.xlsx [file d4ce00903g1.xlsx]

## Sheet: energies
energies	B86bPBE	B86bPBE25	B86bPBE50		B86bPBE	B86bPBE25	B86bPBE50
AJAKEB02	-226972	-226972		-226916	-226916		-226864	-226863		cont		T	298
BATYAZ	-125943	-125943		-125911	-125911		-125881	-125881		salt
BATYIH	-51838	-51837.9		-51825.8	-51825.7		-51814.7	-51814.5		cc
BEYZIR	-143440	-143440		-143418	-143418		-143398	-143398		cc
BEYZOX	-241558	-241555		-241515	-241512		-241476	-241473		cc
BEYZUD	-157112	-157113		-157088	-157089		-157065	-157067		salt
GOKQUV07	-128946	-128946		-128918	-128918		-128893	-128893		cc
GOKREG05	-116705	-116705		-116690	-116690		-116676	-116676		cont
LOLSUA	-157460	-157460		-157451	-157451		-157443	-157442		cc
LUNNAJ10	-240742	-240743		-240708	-240708		-240676	-240676		cont
RAKQAV03	-157460	-157460		-157451	-157451		-157442	-157442		cont
SEDJUI02	-101641	-101641		-101618	-101618		-101596	-101596		cont
TOYGOF01	-219405	-219407		-219350	-219353		-219301	-219303		salt
ULAWAF03	-32999.4	-32999.5		-32991.5	-32991.5		-32984.2	-32984.1		cont
ULAWAF05	-131998	-131998		-131966	-131966		-131937	-131936		cc
ZIKQOB01	-137915	-137916		-137879	-137879		-137845	-137845		salt
	B86bPBE	B86bPBE25	B86bPBE50		B86bPBE	B86bPBE25	B86bPBE50
AJAKEB02	-0.209289	1.24137	2.45542		cc	cc	both			cont
BATYAZ	-1.80128	-1.02285	-0.496455		salt	both	both			salt
BATYIH	0.28961	0.857243	1.25155		cc	both	both			cc
BEYZIR	1.83376	2.35694	2.66177		cc		both			cc
BEYZOX	16.0047	17.3402	18.2771		cc	cc	cc			cc
BEYZUD	-13.9344	-14.4476	-15.0963		salt	salt	salt			salt
GOKQUV07	-1.20675	1.29918	3.23834		both	both	both			cc
GOKREG05	-1.72653	-0.475239	0.485701		salt	both	both			cont
LOLSUA	-0.194081	1.14455	2.21579		both	both	both			cc
LUNNAJ10	-1.74871	-0.357412	0.76725		salt	both	both			cont
RAKQAV03	-1.8761	-0.750995	0.0849623		salt	both	both			cont
SEDJUI02	-1.72549	-0.0387308	1.2683		salt	both	both			cont
TOYGOF01	-8.39066	-7.84863	-7.5326		salt	salt	salt			salt
ULAWAF03	-1.03028	0.227657	1.19191		salt	both	both			cont
ULAWAF05	-0.277832	1.20193	2.44105		cc	both	both			cc
ZIKQOB01	-2.09858	-1.6897	-1.49838		salt	salt	both			salt
	energy				survival			saltfrac
cocrystal
AJAKEB02	-0.209289	1.24137	2.45542		cc	cc	both	0.587446	0.109463	0.0155754
BATYIH	0.28961	0.857243	1.25155		cc	both	both	0.380117	0.190373	0.107798
BEYZIR	1.83376	2.35694	2.66177		cc	both	both	0.0432484	0.0183418	0.0110435
BEYZOX	16.0047	17.3402	18.2771		cc	cc	cc	1.83051e-12	1.91918e-13	3.94524e-14
GOKQUV07	-1.20675	1.29918	3.23834		both	both	both	0.884708	0.100302	0.00420005
LOLSUA	-0.194081	1.14455	2.21579		both	both	both	0.581208	0.126447	0.0231642
ULAWAF05	-0.277832	1.20193	2.44105		cc	both	both	0.615186	0.116124	0.0159518
continuum
BATYAZ	-1.80128	-1.02285	-0.496455		salt	both	both	0.954425	0.84906	0.698116
GOKREG05	-1.72653	-0.475239	0.485701		salt	both	both	0.948609	0.690512	0.305725
LUNNAJ10	-1.74871	-0.357412	0.76725		salt	both	both	0.950404	0.646467	0.214903
RAKQAV03	-1.8761	-0.750995	0.0849623		salt	both	both	0.959615	0.78043	0.464193
SEDJUI02	-1.72549	-0.0387308	1.2683		salt	both	both	0.948523	0.516345	0.105107
ULAWAF03	-1.03028	0.227657	1.19191		salt	both	both	0.85066	0.405058	0.117872
salt
BEYZUD	-13.9344	-14.4476	-15.0963		salt	salt	salt	1	1	1
TOYGOF01	-8.39066	-7.84863	-7.5326		salt	salt	salt	0.999999	0.999998	0.999997
ZIKQOB01	-2.09858	-1.6897	-1.49838		salt	salt	both	0.971908	0.94549	0.926235
					0%	25%	50%
			cocrystal	cc	4	1	1
			both	both	2	11	12
			salt	salt	9	3	2

## Sheet: transition
AJAKEB	B86bPBE	B86bPBE25	B86bPBE50		B86bPBE	B86bPBE25	B86bPBE50
0	-226972	-226916	-226864		0	0	0
1	-226973	-226916	-226864		-0.645402	-0.155931	0.289883
2	-226973	-226916	-226864		-0.780021	0.141399	0.978227
3	-226973	-226916	-226864		-0.717845	0.593591	1.78217
4	-226973	-226916	-226863		-0.527097	1.0759	2.52363
5	-226972	-226916	-226863		-0.419809	1.41295	3.06246
6	-226972	-226916	-226863		-0.386039	1.5717	3.3242
7	-226972	-226916	-226863		-0.416166	1.54416	3.28321
8	-226973	-226916	-226863		-0.527451	1.34828	2.99191
9	-226973	-226916	-226863		-0.524044	1.1726	2.63256
10	-226972	-226916	-226863		-0.209289	1.24137	2.45542
LOLSUA	B86bPBE	B86bPBE25	B86bPBE50		B86bPBE	B86bPBE25	B86bPBE50
0	-157460	-157451	-157443		0	0	0
1	-157460	-157451	-157442		-0.565207	-0.0482747	0.423384
2	-157460	-157451	-157442		-0.491701	0.508159	1.41421
3	-157460	-157451	-157442		-0.133919	1.28802	2.57548
4	-157460	-157451	-157442		0.239008	1.99853	3.58749
5	-157460	-157451	-157442		0.467735	2.45271	4.23559
6	-157460	-157451	-157442		0.452597	2.54515	4.41305
7	-157460	-157451	-157442		0.199105	2.25971	4.07807
8	-157460	-157451	-157442		-0.191956	1.71239	3.36112
9	-157460	-157451	-157442		-0.464171	1.18591	2.57344
10	-157460	-157451	-157442		-0.194081	1.14455	2.21579
ULAWAF03	B86bPBE	B86bPBE25	B86bPBE50		B86bPBE	B86bPBE25	B86bPBE50
0	-32999.4	-32991.5	-32984.2		0	0	0
1	-32999.5	-32991.5	-32984.2		-0.568844	-0.13445	0.26155
2	-32999.5	-32991.5	-32984.1		-0.759959	0.067174	0.817948
3	-32999.5	-32991.4	-32984.1		-0.752552	0.398413	1.43752
4	-32999.5	-32991.4	-32984		-0.714104	0.700567	1.96863
5	-32999.5	-32991.4	-32984		-0.709135	0.877885	2.28806
6	-32999.5	-32991.4	-32984		-0.786865	0.872724	2.32684
7	-32999.5	-32991.4	-32984		-0.973748	0.686845	2.11441
8	-32999.5	-32991.4	-32984		-1.15683	0.419516	1.74092
9	-32999.5	-32991.5	-32984.1		-1.25165	0.195652	1.36637
10	-32999.5	-32991.5	-32984.1		-1.03028	0.227657	1.19191
ZIKQOB	B86bPBE	B86bPBE25	B86bPBE50		B86bPBE	B86bPBE25	B86bPBE50
0	-137915	-137879	-137845		0	0	0
1	-137915	-137879	-137845		-0.597916	-0.19271	0.169127
2	-137915	-137879	-137845		-0.849263	-0.118127	0.530465
3	-137915	-137879	-137845		-0.970951	0.015493	0.884576
4	-137915	-137879	-137845		-1.11507	0.048131	1.0632
5	-137916	-137879	-137845		-1.30968	-0.0836676	0.969613
6	-137916	-137879	-137845		-1.62011	-0.422421	0.581721
7	-137916	-137879	-137845		-1.98977	-0.899075	-0.0171954
8	-137916	-137879	-137845		-2.2993	-1.38327	-0.68475
9	-137916	-137879	-137845		-2.38606	-1.70586	-1.246
10	-137916	-137879	-137845		-2.09858	-1.6897	-1.49838
SEDJUI	B86bPBE	B86bPBE25	B86bPBE50		B86bPBE	B86bPBE25	B86bPBE50
0	-101641	-101618	-101596		0	0	0
1	-101641	-101618	-101596		-0.697894	-0.0449399	0.540075
2	-101641	-101618	-101596		-0.714425	0.527363	1.63502
3	-101641	-101617	-101596		-0.458618	1.27268	2.80914
4	-101641	-101617	-101596		-0.238866	1.86941	3.73047
5	-101641	-101617	-101596		-0.235941	2.11456	4.17287
6	-101641	-101617	-101596		-0.504788	1.94523	4.06515
7	-101641	-101617	-101596		-0.984751	1.42225	3.4711
8	-101641	-101617	-101596		-1.53902	0.706489	2.57787
9	-101641	-101618	-101596		-1.91347	0.0848931	1.70169
10	-101641	-101618	-101596		-1.72549	-0.0387308	1.2683

## Sheet: NMR fit
		PBE		rSCAN
AJAKEB	exp	salt	cc	salt	cc
A-C1	135.53	30.48	34.01	42.23	46.88			-1.04837	170.589		-1.02552	170.069
A-C2	131.08	37.79	37.44	49.04	50.63			0.0540911	1.74308		0.0242319	0.789127
A-C3-1	125.06	44.94	45.02	55.92	57.37			0.974069	2.75902		0.994448	1.27668
A-C3-2	126.48	43.61	43	54.52	55.92			375.644	10		1791.07	10
A-C4	149.87	19.76	19.27	30.5	32.44			2859.48	76.1221		2919.31	16.2992
A-COOH	169.13	-0.9	-0.01	13.98	14.6
B-C2-1	145.13	27.86	24.83	39.18	38.3
B-C2-2	149.36	24.28	20.1	36.07	34.16
B-C3-1	120.98	46.24	48.57	56.86	60.71
B-C3-2	123.61	40.66	42.18	52.22	55.85
B-C4	143.15	24.79	27.34	36.29	40.33
B-CONH2	167.08	4.46	3.8	16.88	17.04
		0.974069	0.994448	0.978051	0.997051
		PBE		rSCAN
ZIKQOB01	exp	salt	cc	salt	cc
A-C1	138.69	31.28	33.67	43.84	45.13			-1.02112	170.283		-0.966733	168.662
A-C2	131.13	36.91	36.71	49.93	48.21			0.02788	0.863661		0.037647	1.17472
A-C3	148.63	20.22	20.41	33.28	31.68			0.993336	1.27005		0.986535	1.80525
A-C4	119.08	50.54	49.63	62.75	59.84			1341.44	9		659.405	9
A-COOH	164.23	4.42	3.83	18.34	18.18			2163.77	14.5172		2148.96	29.3305
B-C2	144.88	26.69	24	40.31	35.87				1.61302			3.25894
B-C3	129.58	40.14	42.22	53.12	52.87
B-C4	142.76	27.19	29.41	41.35	41.16
B-C5	128.52	39.46	41.11	52.86	52.39
B-C6	146.89	24.39	20.32	37.71	32.15
B-COOH	166.84	4.19	2.86	18.29	17.44
		0.993336	0.986535	0.992167	0.983814
		PBE		rSCAN
LUNNAJ	exp	salt	cc	salt	cc
A-C2	44.64	121.88	121.94	129.81	131.03			-1.03172	170.624		-1.02149	170.138
A-COOH	173.22	-5.52	-5.55	9.6	9.39			0.0257743	1.31256		0.0151819	0.776257
B-C2-1	143.44	29.73	27	43.55	40.39			0.996269	2.61868		0.998676	1.55982
B-C2-2	146.53	26.3	21.88	40.43	36.36			1602.32	6		4527.02	6
B-C3-1	123.21	44.01	46.54	56.94	58.82			10987.9	41.1448		11014.4	14.5982
B-C3-2	125.93	41.68	43.82	55.21	56.65				6.85747			2.43304
B-C4	145.15	23.74	26.14	36.67	39.3
B-CONH2	164.93	6.96	6.1	20.12	19.38
		0.996269	0.998676	0.995733	0.999023
		PBE		rSCAN
SEDJUI	exp	salt	cc	salt	cc
A-C1	166.71	-6.2	0.01	7.28	15.41			-0.979174	168.134		-0.985174	169.013
A-C2	117.68	49.98	51.6	61.69	63.92			0.026097	2.01003		0.013397	1.03599
A-C3	137.97	30.32	29.8	43.23	42.92			0.992947	4.33316		0.998154	2.21668
A-C4	136.73	34.76	32.17	46.73	43.36			1407.79	10		5407.71	10
A-C5	127.9	39.48	39.93	52.01	52.44			26433.1	187.763		26571.7	49.1367
A-C6	116.46	49.35	51.76	61.32	64.54				18.7763			4.91367
A-CH3	22.11	147.77	148.38	153.07	154.42
B-C2	146.45	31.63	26.34	44.61	38.01
B-C3	106.71	61.69	62.85	73.17	74.81
B-C4	154.84	18.02	19.09	30.11	31.56
B-CH3-1	36.82	134.76	135.2	141.67	142.24
B-CH3-2	38.82	131.92	132.65	138.43	140.2
		0.992947	0.998154	0.992404	0.998831

## Sheet: PUGDUT
B86bPBE25-XDM
cocrystal	-143099
salt	-143099
difference	-0.283776	kcal/mol
rel solubility	1.5851
lit
diff	-4.95	kJ/mol
	-1.18308	kcal/mol
rel solubility	6.82422
